# Supplementary material for: Comprehensive Analyses of the Histone Deacetylases Tuin (HDT) Gene Family in Brassicaceae Reveals Their Roles in Stress Response
Source: MDPI journal article supplement (doi:10.3390/ijms24010525), 2022-12-28
Supplement: s1 [file s1]

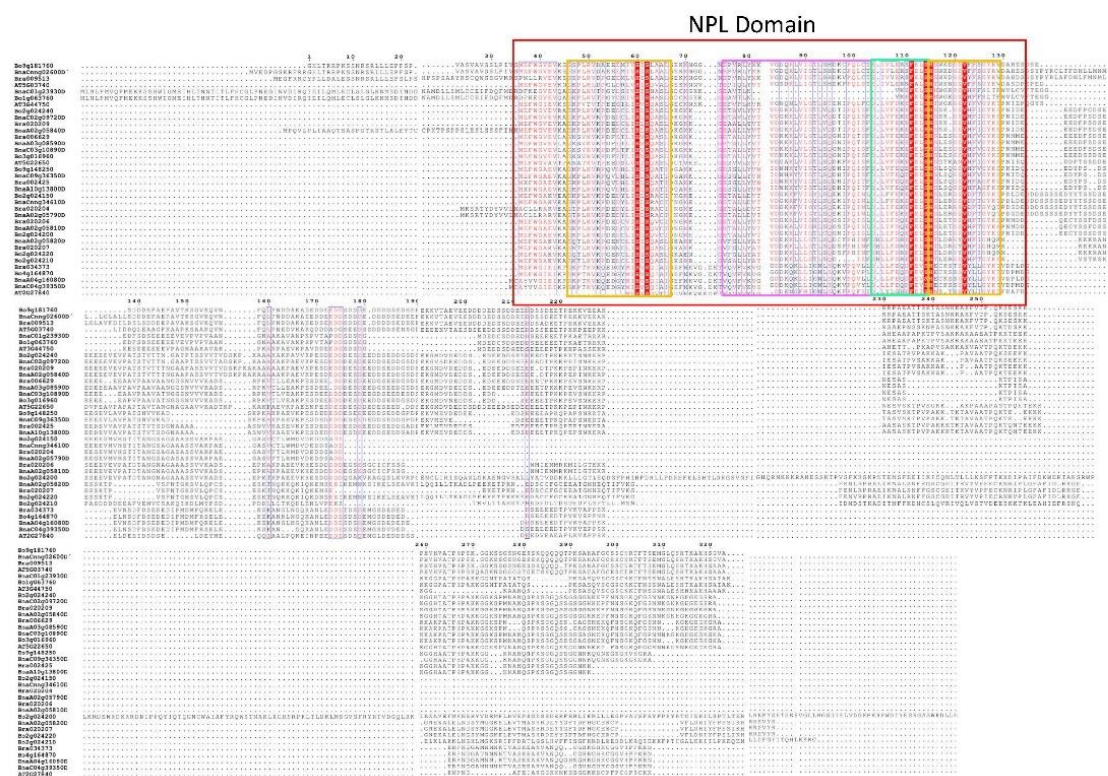

**Figure S1.** Sequence alignment of HDT proteins.

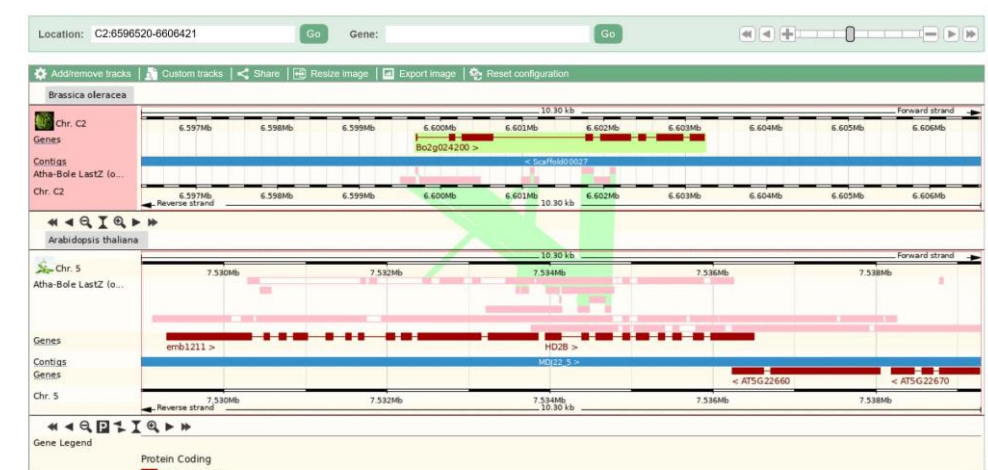

**Figure S2.** Comparison of gene structure between *ATHDT2* and *Bo2g024200*.

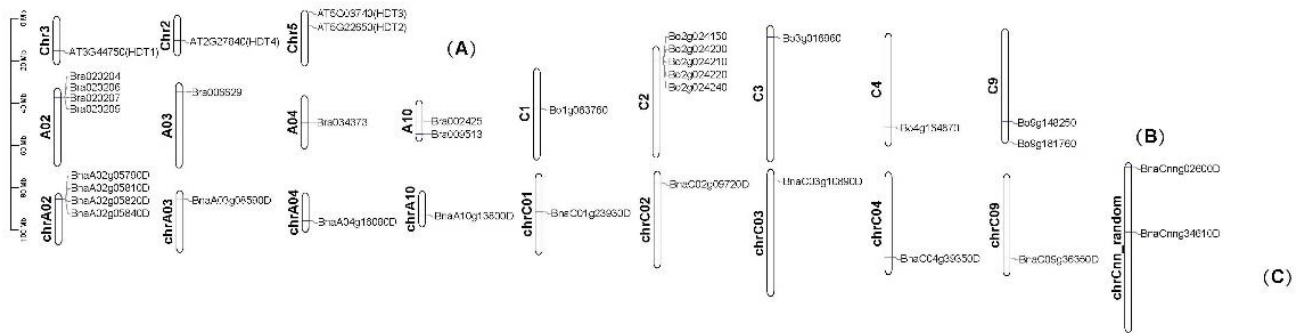

**Figure S3.** Chromosomal localizations of HDT genes in *Arabidopsis* (A), *B. rapa*, (Bra) and *B. oleracea* (Bo) (B), and *B. napus* (C). (A) Chr2, Chr3, Chr5: *Arabidopsis* chromosomes, (B) A02, A03, A04, A10: *B. rapa*, chromosomes; C2, C3, C4, C9: *B. oleracea* chromosomes, (C) ChrA02, chrA03, chrA04, chrA10: *B. napus* An-subgenome chromosomes; ChrC02, chrC03, chrC04, chrC09: *B. napus* Cn-subgenome chromosomes; random means genes were randomly distributed to a specific chromosome. ChrCnn were unanchored scaffolds that could not be mapped to a specific chromosome from the *B. napus* C-subgenomes.

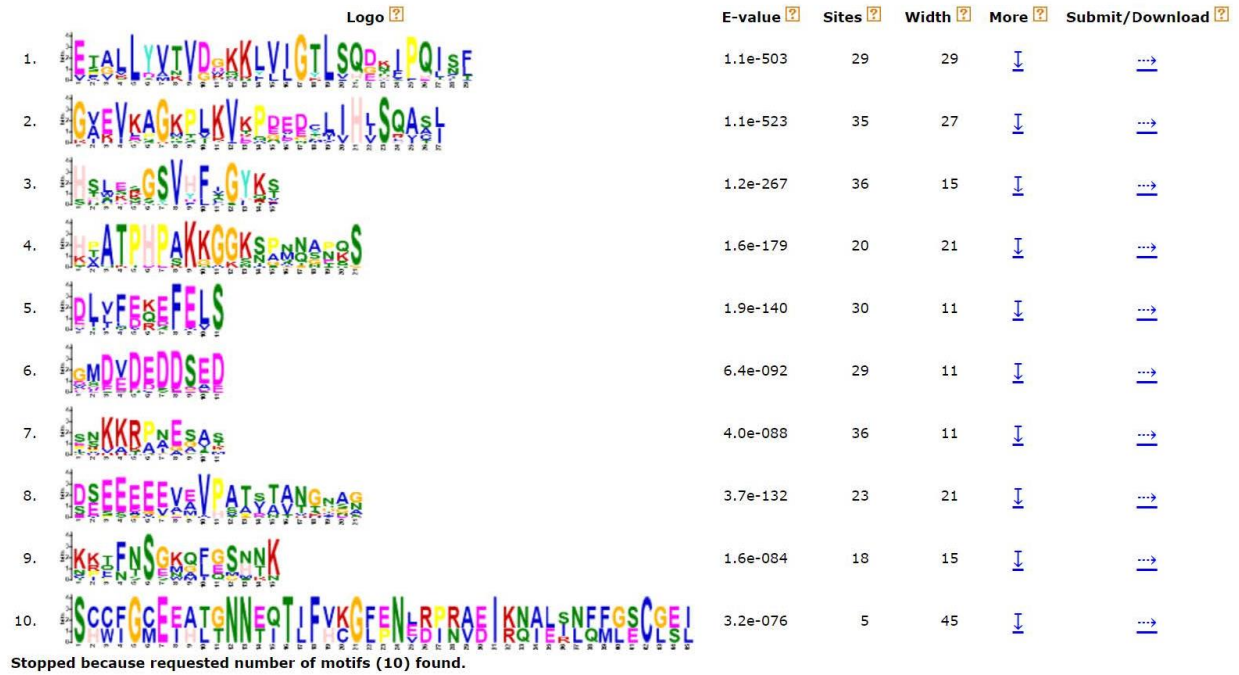

**Figure S4.** 10 motifs were detected in HDT proteins using MEME.

**Table S1.** RNA-seq data of expression levels of *AtHDT* , *BraHDT*, *BoHDT* and *BnaHDT* genes in different tissues and organs.

| gene_id       | root     | stem       | leaf        | bud        | sepal       | stamen      | newpistil | blosomypistil    | wiltingpistil    | ovule            | pericarp         | silique  |
|---------------|----------|------------|-------------|------------|-------------|-------------|-----------|------------------|------------------|------------------|------------------|----------|
| BnaA02g05840D | 94.18644 | 92.0765223 | 39.00577597 | 110.228006 | 23.61232111 | 340.0437106 | 7.962097  | 36.81925         | 3.398101         | 130.345          | 170.4775         | 329.03   |
| BnaC02g09720D | 61.91186 | 63.9230658 | 27.44350117 | 83.2342217 | 13.94473728 | 228.8799195 | 6.064687  | 10.24578         | 1.260797         | 73.90664         | 95.16839         | 182.4752 |
| BnaA03g08590D | 8.434458 | 43.0048952 | 10.36822358 | 23.2457629 | 1.464976139 | 60.94503219 | 0.661402  | 0.644645         | 0                | 16.24339         | 17.81137         | 44.6983  |
| BnaC03g10890D | 8.125341 | 18.3789342 | 3.609988776 | 9.34433637 | 0.627846917 | 26.69425264 | 0.955359  | 1.002781         | 0.171875         | 10.85459         | 12.7343          | 13.6304  |
| BnaA10g13800D | 11.6763  | 7.91607987 | 9.241904515 | 29.2885017 | 7.716286536 | 50.18456797 | 1.161241  | 4.75364          | 1.176884         | 24.08565         | 22.70864         | 43.07622 |
| BnaC09g36350D | 11.58095 | 5.07421341 | 5.415465653 | 12.3152015 | 3.688500406 | 28.31526172 | 0.932552  | 1.060412         | 0.908764         | 9.850269         | 13.81821         | 15.3581  |
| BnaA02g05810D | 0.065881 | 0.2701417  | 0.563621126 | 0          | 0.20815105  | 0.857767919 | 0         | 0.10686          | 0                | 1.033651         | 0.248342         | 0.560968 |
| BnaA02g05790D | 0.069646 | 0.57115674 | 0.066203116 | 0.5807824  | 0           | 0.129540461 | 0         | 0                | 0                | 24.76825         | 0.7876           | 2.890987 |
| BnaCnng34610D | 0.299092 | 1.07310891 | 1.208308413 | 0.15588485 | 0           | 0.278154364 | 0         | 0                | 0                | 28.54695         | 0.845583         | 2.546724 |
| BnaA02g05820D | 2.586523 | 2.81216644 | 3.352730172 | 8.53782807 | 4.828970499 | 11.00677391 | 7.761022  | 3.686843         | 7.702872         | 7.446794         | 11.52277         | 10.51138 |
| BnaA04g16080D | 0.551494 | 1.1306836  | 0.996042362 | 0.40240862 | 0           | 4.10309153  | 0         | 0.089453         | 0                | 1.057557         | 0.623666         | 1.056574 |
| BnaC04g39350D | 1.523502 | 2.42939934 | 1.716377092 | 0.94108259 | 0.08913876  | 7.451575139 | 0         | 0.274571         | 0                | 2.852643         | 1.276204         | 2.522407 |
| BnaC01g23930D | 7.840459 | 7.99924174 | 6.711139088 | 15.8420351 | 1.81973517  | 38.082131   | 1.422284  | 1.988965         | 0.361566         | 11.66009         | 14.28726         | 23.01806 |
| BnaCnng02600D | 31.23818 | 21.6983567 | 12.72138315 | 31.8505053 | 6.687654181 | 60.57921567 | 5.624699  | 9.192358         | 2.923319         | 17.02163         | 24.70903         | 40.37062 |
| gene          | Root     | Leaf       | Stem        | Sepals     | Stamens     | Carpels     | Flower    | Siliques Stage 3 | Siliques Stage 4 | Siliques Stage 5 | Siliques Stage 6 |          |
| AT3G44750     | 475.5    | 130.72     | 36.77       | 110.33     | 76.1        | 411.3       | 404.58    | 106.8            | 140.05           | 98.07            | 106.67           |          |
| AT5G22650     | 671.3    | 324.28     | 173.33      | 303.27     | 236.38      | 856.32      | 772.63    | 368.2            | 383.08           | 344.88           | 384.83           |          |
| AT5G03740     | 224.73   | 115.72     | 80.03       | 108.03     | 155.27      | 444.3       | 450.25    | 225.18           | 262.1            | 216.55           | 260.08           |          |
| AT2G27840     | 363.78   | 146.38     | 63.2        | 101.08     | 58.52       | 197.95      | 289       | 111.02           | 103.9            | 94.03            | 69.4             |          |
| tracking_id   | Root     | Stem       | Leaf        | Bud        | Flower      | Silique     | Callus    |                  |                  |                  |                  |          |
| Bo1g063760    | 2.10526  | 0.603312   | 8.05516     | 2.86231    | 1.3393      | 2.52561     | 5.96444   |                  |                  |                  |                  |          |
| Bo2g024150    | 0        | 0.449708   | 0           | 0          | 0.147898    | 29.2354     | 0.164663  |                  |                  |                  |                  |          |
| Bo2g024200    | 0.068238 | 0.273772   | 1.82764     | 1.91411    | 1.55314     | 1.41574     | 0.150364  |                  |                  |                  |                  |          |
| Bo2g024210    | #N/A     | #N/A       | #N/A        | #N/A       | #N/A        | #N/A        | #N/A      |                  |                  |                  |                  |          |
| Bo2g024220    | 6.38207  | 2.57612    | 12.5072     | 8.88869    | 10.8752     | 10.2268     | 7.88907   |                  |                  |                  |                  |          |
| Bo2g024240    | 204.962  | 62.2215    | 414.987     | 203.265    | 33.7984     | 116.659     | 273.256   |                  |                  |                  |                  |          |
| Bo3g016960    | 29.5496  | 11.9083    | 29.0509     | 22.2023    | 2.08873     | 21.1134     | 19.6697   |                  |                  |                  |                  |          |
| Bo4g164870    | 5.72536  | 1.689      | 4.12038     | 6.18558    | 0.888751    | 6.37722     | 11.2555   |                  |                  |                  |                  |          |
| Bo9g148250    | #N/A     | #N/A       | #N/A        | #N/A       | #N/A        | #N/A        | #N/A      |                  |                  |                  |                  |          |
| Bo9g181760    | #N/A     | #N/A       | #N/A        | #N/A       | #N/A        | #N/A        | #N/A      |                  |                  |                  |                  |          |
| Bra002425     | 32.2377  | 40.7451    | 44.4231     | 36.9564    | 21.1477     | 34.4548     | 15.5953   |                  |                  |                  |                  |          |
| Bra006629     | 40.7167  | 32.784     | 84.4606     | 81.825     | 31.7366     | 54.1575     | 14.612    |                  |                  |                  |                  |          |
| Bra009513     | 67.1451  | 68.7888    | 46.2489     | 51.2764    | 86.3331     | 85.3799     | 63.0488   |                  |                  |                  |                  |          |
| Bra020204     | 0.293098 | 0.371959   | 0.1719345   | 0.147938   | 0           | 32.6815     | 0         |                  |                  |                  |                  |          |
| Bra020206     | 0        | 0          | 0           | 0          | 0           | 0.334215    | 0         |                  |                  |                  |                  |          |
| Bra020207     | 0.061075 | 0          | 0.0768449   | 0.0924615  | 0.183224    | 1.1041      | 0.097938  |                  |                  |                  |                  |          |
| Bra020209     | 268.5685 | 476.247    | 436.6785    | 467.123    | 147.943     | 219.433     | 168.179   |                  |                  |                  |                  |          |
| Bra034373     | 19.3331  | 16.5746    | 28.6557     | 30.5637    | 8.90675     | 21.0393     | 5.71304   |                  |                  |                  |                  |          |

**Table S2:** RNA-seq data of expression levels of *BnaHDT* genes under different abiotic stresses and plant hormones treatments.

| gene<br>_id | Le | Le | Le | C  | C  | Co  | H  | H  | H  | A  | A  | A   | M   | M   | M   |    |    | E  | S  | S  | S  | R  | R  | Ro  | N  | N  |     | P  | P  |    |    |
|-------------|----|----|----|----|----|-----|----|----|----|----|----|-----|-----|-----|-----|----|----|----|----|----|----|----|----|-----|----|----|-----|----|----|----|----|
|             | af | af | af | ol | ol | ld  | ot | ot | ot | B  | B  | B   | ej  | ej  | ej  | E  | E  | T_ | A  | A  | A  | oo | oo | ot  | a  | a  | Na  | E  | E  | PE |    |
|             | _3 | _6 | _1 | d_ | d_ | _1  | _3 | _6 | _1 | A  | A  | A_  | A   | A   | A_  | T_ | T_ | 12 | _3 | _6 | _1 | t_ | t_ | _1  | Cl | Cl | Cl  | G  | G  | G  |    |
|             | h  | h  | 2h | 3h | 6h | 2h  | h  | h  | 2h | h  | h  | h   | h   | h   | h   | h  | h  | h  | h  | h  | h  | 2h | 3h | 6h  | 2h | h  | h   | 2h | h  | h  | 2h |
| Bna         | 50 | 41 | 21 | 10 | 42 | 11  | 40 | 42 | 77 | 38 | 75 | 35. | 48. | 33. | 23. | 74 | 78 | 31 | 42 | 71 | 88 | 92 | 11 | 10  | 67 | 87 | 10  | 10 | 90 | 82 |    |
| A02         | .8 | .1 | .6 | .8 | .8 | 6.9 | .1 | .5 | .3 | .4 | .6 | 09  | 77  | 39  | 45  | .5 | .4 | .0 | .2 | .1 | .3 | .2 | 1. | 8.6 | .1 | .0 | 1.9 | 9. | .6 | .0 |    |
| g058        | 70 | 00 | 68 | 10 | 86 | 07  | 08 | 40 | 03 | 59 | 70 | 03  | 82  | 21  | 70  | 47 | 27 | 21 | 66 | 69 | 21 | 02 | 49 | 52  | 40 | 13 | 87  | 92 | 76 | 30 |    |
| 40D         | 44 | 06 | 75 | 15 | 17 | 2   | 27 | 06 | 6  | 93 | 1  | 4   | 2   | 8   | 7   | 82 | 34 | 67 | 86 | 16 | 44 | 99 | 07 | 8   | 72 | 88 | 8   | 65 | 15 | 05 |    |
| Bna         | 46 | 41 | 21 | 10 | 16 | 35. | 45 | 59 | 11 | 37 | 60 |     | 44. | 33. | 22. | 67 | 67 | 28 | 40 | 62 | 80 | 86 | 10 | 10  | 70 | 93 | 10  | 11 | 96 | 83 |    |
| C02         | .7 | .9 | .9 | .1 | .6 | 21  | .5 | .0 | 0. | .9 | .8 | 35. | 44  | 76  | 98  | .9 | .6 | .0 | .8 | .5 | .6 | .5 | 6. | 0.2 | .5 | .0 | 0.3 | 0. | .5 | .3 |    |
| g097        | 36 | 07 | 19 | 66 | 40 | 56  | 99 | 80 | 56 | 65 | 82 | 00  | 66  | 13  | 08  | 26 | 62 | 34 | 75 | 88 | 42 | 74 | 72 | 79  | 98 | 48 | 37  | 55 | 25 | 53 |    |
| 20D         | 08 | 91 | 18 | 53 | 47 | 8   | 39 | 86 | 96 | 21 | 62 | 65  | 6   | 7   | 2   | 25 | 69 | 6  | 63 | 69 | 27 | 55 | 16 | 4   | 53 | 77 | 8   | 33 | 24 | 91 |    |
| Bna         | 10 | 10 | 3. | 1. | 3. | 3.9 | 3. | 5. | 4. | 8. | 27 | 3.7 | 10. |     | 3.6 | 22 | 21 | 4. | 8. | 18 | 22 | 16 | 24 |     | 13 | 16 | 24. | 22 | 16 | 15 |    |
| A03         | .1 | .1 | 96 | 71 | 02 | 56  | 46 | 61 | 47 | 65 | .3 | 56  | 17  | 7.7 | 74  | .0 | .0 | 52 | 98 | .2 | .3 | .3 | .5 | 24. | .5 | .6 | 72  | .6 | .8 | .4 |    |
| g085        | 64 | 93 | 23 | 29 | 57 | 87  | 24 | 63 | 42 | 56 | 89 | 03  | 29  | 27  | 06  | 50 | 62 | 58 | 25 | 78 | 11 | 05 | 24 | 39  | 74 | 88 | 66  | 25 | 91 | 78 |    |
| 90D         | 08 | 13 | 3  | 27 | 81 | 5   | 71 | 08 | 85 | 15 | 71 | 9   | 9   | 65  | 1   | 23 | 46 | 41 | 6  | 25 | 34 | 74 | 71 | 78  | 46 | 85 | 6   | 63 | 52 | 84 |    |
| Bna         | 2. | 2. | 1. | 0. | 0. |     | 0. | 1. | 0. | 1. | 7. | 2.2 | 3.1 | 2.2 | 1.1 | 4. | 6. | 0. | 1. | 3. | 5. | 5. | 7. | 6.0 | 3. | 5. | 7.6 | 7. | 7. | 5. |    |
| C03         | 04 | 92 | 08 | 36 | 42 | 0.9 | 99 | 90 | 98 | 93 | 43 | 08  | 32  | 60  | 03  | 62 | 20 | 99 | 97 | 80 | 68 | 80 | 12 | 67  | 93 | 06 | 37  | 45 | 17 | 02 |    |
| g108        | 35 | 35 | 78 | 91 | 43 | 97  | 82 | 06 | 28 | 18 | 19 | 83  | 32  | 55  | 26  | 68 | 98 | 91 | 35 | 49 | 29 | 03 | 24 | 05  | 04 | 08 | 02  | 45 | 67 | 31 |    |
| 90D         | 9  | 06 | 18 | 94 | 42 | 68  | 39 | 7  | 64 | 76 | 7  | 4   | 2   | 5   | 4   | 58 | 79 | 2  | 81 | 21 | 78 | 81 | 07 | 1   | 44 | 84 | 2   | 9  | 75 | 27 |    |
| Bna         | 8. | 11 | 6. | 2. | 3. | 6.4 | 6. | 7. | 15 | 8. | 17 | 12. | 8.9 | 9.2 | 7.5 | 12 | 19 | 9. | 9. | 12 | 12 | 16 | 18 | 19. | 14 | 15 | 17. |    | 13 | 16 |    |
| A10         | 14 | .0 | 25 | 55 | 52 | 42  | 99 | 76 | .8 | 71 | .2 | 98  | 13  | 00  | 98  | .7 | .7 | 37 | 13 | .1 | .7 | .5 | .2 | 62  | .5 | .6 | 77  | 16 | .7 | .1 |    |
| g138        | 80 | 26 | 20 | 13 | 40 | 44  | 19 | 73 | 53 | 12 | 20 | 80  | 45  | 37  | 66  | 89 | 80 | 02 | 52 | 84 | 14 | 46 | 24 | 32  | 96 | 03 | 82  | .4 | 87 | 17 |    |
| 00D         | 11 | 81 | 69 | 56 | 51 | 8   | 81 | 72 | 35 | 63 | 8  | 2   | 8   | 8   | 1   | 74 | 68 | 03 | 2  | 77 | 05 | 33 | 05 | 9   | 82 | 89 | 6   | 95 | 83 | 85 |    |
| Bna         | 8. |    | 5. | 2. | 4. | 8.5 | 2. | 3. | 6. | 6. | 10 | 8.3 |     | 5.7 | 5.1 | 8. | 11 | 7. | 8. | 11 | 11 | 9. | 14 | 14. | 12 | 13 | 16. | 12 | 10 | 12 |    |
| C09         | 63 | 6. | 31 | 51 | 61 | 93  | 95 | 01 | 07 | 15 | .5 | 78  | 8.1 | 04  | 51  | 51 | .6 | 13 | 21 | .4 | .7 | 99 | .7 | 19  | .9 | .3 | 22  | .0 | .4 | .3 |    |
| g363        | 20 | 81 | 28 | 50 | 63 | 64  | 86 | 47 | 69 | 44 | 44 | 40  | 68  | 76  | 81  | 62 | 00 | 04 | 51 | 35 | 36 | 37 | 22 | 52  | 15 | 04 | 76  | 44 | 88 | 08 |    |
| 50D         | 78 | 44 | 43 | 65 | 69 | 3   | 92 | 31 | 22 | 47 | 39 | 3   | 34  | 6   | 9   | 79 | 37 | 14 | 46 | 72 | 78 | 76 | 28 | 7   | 12 | 16 | 5   | 26 | 05 | 58 |    |
| Bna         | 0. | 0. | 0. | 0. | 0. | 0.3 | 0. | 0. | 0. | 0. | 0. | 0.4 |     |     |     | 0. | 0. | 0. | 0. | 0. | 0. |    | 0. | 0.0 | 0. | 0. | 0.0 |    | 0. | 0. |    |
| A02         | 32 | 61 | 18 | 12 | 20 | 72  | 09 | 43 | 36 | 07 | 61 | 08  | 0.4 | 0.2 | 0.1 | 62 | 92 | 34 | 47 | 27 | 53 |    | 03 | 43  | 09 | 14 | 58  |    | 05 | 03 |    |
| g058        | 28 | 77 | 65 | 05 | 26 | 86  | 60 | 37 | 33 | 68 | 18 | 39  | 11  | 79  | 41  | 39 | 73 | 69 | 52 | 88 | 41 |    | 19 | 29  | 17 | 06 | 93  |    | 30 | 06 |    |
| 10D         | 93 | 63 | 53 | 3  | 78 | 8   | 81 | 2  | 57 | 89 | 12 | 3   | 03  | 52  | 46  | 16 | 12 | 95 | 43 | 49 | 74 | 0  | 97 | 8   | 5  | 27 | 1   | 0  | 07 | 04 |    |
| Bna         |    |    |    |    |    |     |    |    |    |    |    |     |     |     |     |    |    |    |    |    |    | 0. | 0. |     |    | 0. | 0.1 | 0. | 0. |    |    |
| A02         |    |    |    |    |    |     |    |    |    |    |    |     |     |     |     |    |    |    |    |    |    |    | 02 | 03  |    |    | 05  | 40 | 14 | 10 |    |
| g057        |    |    |    |    |    |     |    |    |    |    |    |     |     |     |     |    |    |    |    |    |    |    |    |     |    | 87 | 80  | 70 | 41 |    |    |
| 90D         | 0  | 0  | 0  | 0  | 0  | 0   | 0  | 0  | 0  | 0  | 0  | 0   | 0   | 0   | 0   | 0  | 0  | 0  | 0  | 0  | 0  | 0  | 91 | 89  | 0  | 0  | 6   | 5  | 21 | 12 | 0  |
| Bna         | 0. | 0. | 0. | 0. | 0. | 0.1 | 0. | 0. |    | 0. | 0. | 0.0 | 0.0 |     |     | 0. | 0. | 0. | 0. | 0. | 0. | 0. | 0. | 0.0 |    | 0. | 0.5 | 0. | 0. | 0. |    |
| Cnn         | 11 | 02 | 14 | 18 | 25 | 92  | 04 | 18 |    | 09 | 30 | 90  | 32  |     |     | 03 | 01 | 11 | 11 | 19 | 11 | 13 | 02 | 94  |    | 12 | 58  | 12 | 04 | 19 |    |
| g346        | 63 | 72 | 96 | 93 | 59 | 90  | 91 | 16 |    | 47 | 38 | 34  | 72  |     |     | 08 | 84 | 25 | 25 | 94 | 14 | 99 | 37 | 78  |    | 97 | 10  | 42 | 61 | 64 |    |
| 10D         | 84 | 96 | 62 | 58 | 47 | 7   | 18 | 1  | 0  | 65 | 7  | 7   | 7   | 0   | 0   | 85 | 45 | 5  | 5  | 09 | 91 | 98 | 18 | 4   | 0  | 17 | 5   | 25 | 5  | 29 |    |

|      |    |    |    |    |    |     |    |    |    |    |    |     |     |     |     |    |    |    |    |    |    |    |    |     |    |    |     |    |    |    |
|------|----|----|----|----|----|-----|----|----|----|----|----|-----|-----|-----|-----|----|----|----|----|----|----|----|----|-----|----|----|-----|----|----|----|
| Bna  | 0. | 0. | 1. | 0. | 0. | 0.6 | 1. | 1. | 2. | 0. | 1. | 1.2 | 0.8 | 0.9 | 1.4 | 1. | 1. | 1. | 1. | 1. | 2. | 1. | 1. | 2.1 | 2. | 1. | 1.6 | 1. | 1. | 2. |
| A02  | 99 | 77 | 19 | 76 | 34 | 80  | 44 | 62 | 37 | 91 | 17 | 24  | 69  | 78  | 13  | 11 | 23 | 70 | 73 | 91 | 07 | 67 | 93 | 07  | 37 | 91 | 02  | 92 | 54 | 44 |
| g058 | 75 | 43 | 87 | 70 | 63 | 01  | 67 | 58 | 37 | 66 | 03 | 41  | 98  | 17  | 27  | 64 | 62 | 49 | 87 | 04 | 01 | 24 | 20 | 16  | 18 | 43 | 52  | 65 | 07 | 93 |
| 20D  | 31 | 68 | 37 | 2  | 6  | 2   | 05 | 17 | 4  | 06 | 95 | 3   | 8   | 9   | 1   | 38 | 92 | 49 | 48 | 46 | 12 | 19 | 93 | 8   | 62 | 03 | 4   | 25 | 23 | 65 |
| Bna  | 0. | 0. | 0. | 0. | 0. | 0.6 | 0. | 0. | 0. | 0. | 2. | 0.4 | 0.7 | 0.6 | 0.3 | 1. | 1. | 0. | 0. | 1. | 2. | 1. | 3. | 2.9 | 1. | 1. | 3.0 | 3. | 2. | 2. |
| A04  | 98 | 96 | 30 | 20 | 15 | 79  | 21 | 28 | 36 | 61 | 79 | 89  | 18  | 00  | 41  | 98 | 87 | 35 | 75 | 75 | 29 | 29 | 10 | 15  | 44 | 84 | 44  | 62 | 59 | 90 |
| g160 | 37 | 05 | 22 | 10 | 96 | 88  | 48 | 07 | 01 | 20 | 83 | 07  | 21  | 47  | 90  | 12 | 15 | 46 | 92 | 53 | 13 | 07 | 47 | 71  | 80 | 01 | 14  | 90 | 95 | 07 |
| 80D  | 3  | 79 | 36 | 47 | 85 | 4   | 01 | 84 | 54 | 06 | 84 | 6   | 4   | 1   | 6   | 73 | 81 | 74 | 23 | 57 | 58 | 83 | 95 | 3   | 9  | 37 | 5   | 04 | 81 | 46 |
| Bna  | 3. | 2. | 1. | 0. | 1. | 2.4 | 0. | 0. | 0. | 1. | 8. | 1.8 | 2.5 | 1.4 | 1.1 | 6. | 7. | 0. | 2. | 4. | 6. | 9. | 13 |     | 7. | 9. | 12. | 13 | 8. | 9. |
| C04  | 22 | 82 | 09 | 85 | 53 | 45  | 51 | 79 | 72 | 94 | 41 | 36  | 98  | 91  | 37  | 41 | 96 | 93 | 40 | 38 | 01 | 23 | .2 | 15. | 04 | 41 | 75  | .0 | 93 | 08 |
| g393 | 45 | 62 | 08 | 39 | 99 | 71  | 94 | 72 | 61 | 72 | 05 | 13  | 82  | 57  | 04  | 74 | 61 | 73 | 37 | 87 | 88 | 87 | 45 | 27  | 82 | 23 | 66  | 24 | 55 | 69 |
| 50D  | 7  | 45 | 04 | 9  | 82 | 4   | 89 | 18 | 14 | 95 | 45 | 9   | 2   | 5   | 3   | 8  | 64 | 56 | 59 | 14 | 5  | 12 | 3  | 64  | 38 | 83 | 6   | 02 | 06 | 16 |
| Bna  | 2. | 4. | 3. | 1. | 1. | 2.1 | 2. | 3. | 3. | 3. | 9. |     | 2.6 | 2.2 | 2.2 | 6. | 8. | 3. | 2. | 3. | 4. | 7. | 8. |     | 5. | 5. | 8.0 | 7. | 7. | 7. |
| C01  | 76 | 63 | 03 | 19 | 67 | 04  | 38 | 39 | 52 | 21 | 98 | 3.9 | 15  | 63  | 67  | 59 | 57 | 47 | 97 | 50 | 06 | 35 | 08 | 7.3 | 02 | 01 | 20  | 76 | 99 | 41 |
| g239 | 53 | 39 | 79 | 83 | 16 | 30  | 66 | 59 | 98 | 90 | 74 | 55  | 23  | 96  | 85  | 63 | 41 | 80 | 82 | 18 | 47 | 17 | 69 | 83  | 76 | 17 | 97  | 60 | 44 | 59 |
| 30D  | 52 | 29 | 07 | 34 | 22 | 1   | 46 | 29 | 43 | 28 | 74 | 99  | 8   | 4   | 3   | 68 | 98 | 63 | 66 | 09 | 09 | 98 | 44 | 65  | 82 | 34 | 1   | 82 | 53 | 5  |
| Bna  | 11 | 10 | 11 | 6. | 8. | 11. | 18 | 21 | 49 | 8. | 15 | 9.9 | 10. | 10. | 9.8 | 12 | 12 | 12 | 13 | 13 | 14 | 35 | 43 | 39. | 38 | 40 | 36. | 39 | 36 | 41 |
| Cnn  | .2 | .6 | .8 | 18 | 10 | 37  | .5 | .5 | .8 | 96 | .3 | 05  | 68  | 67  | 91  | .5 | .8 | .5 | .2 | .7 | .3 | .9 | .9 | 99  | .7 | .1 | 84  | .0 | .0 | .0 |
| g026 | 50 | 19 | 08 | 72 | 74 | 04  | 56 | 32 | 86 | 27 | 88 | 72  | 46  | 48  | 15  | 10 | 35 | 97 | 06 | 54 | 37 | 47 | 23 | 09  | 63 | 15 | 96  | 93 | 27 | 48 |
| 00D  | 9  | 47 | 06 | 94 | 73 | 2   | 44 | 78 | 96 | 08 | 73 | 7   | 8   | 8   | 7   | 26 | 63 | 44 | 1  | 27 | 87 | 52 | 07 | 9   | 36 | 08 | 5   | 03 | 11 | 6  |

**Table S3.** RNA-seq data of expression levels of *BnaHDT* genes under different low-temperature.

| gene_id       | HX17_MA  | HX17_CA  | HX17_FA  | HX17_MB  | HX17_CB  | HX17_FB  | HX58_MA  | HX58_CA  | HX58_FA  | HX58_MB  | HX58_CB  | HX58_FB  |
|---------------|----------|----------|----------|----------|----------|----------|----------|----------|----------|----------|----------|----------|
| BnaA02g05840D | 11.67546 | 24.79769 | 8.925661 | 27.69888 | 48.62542 | 86.74409 | 4.498591 | 13.08269 | 12.25774 | 10.23339 | 95.06071 | 126.0484 |
| BnaC02g09720D | 25.63816 | 41.75628 | 16.0856  | 62.25208 | 120.0346 | 134.2699 | 8.203703 | 16.7466  | 14.86383 | 16.61071 | 157.5789 | 138.8114 |
| BnaA03g08590D | 2.734362 | 4.424089 | 2.022714 | 8.152468 | 10.34699 | 8.970388 | 0.287605 | 1.196378 | 1.419705 | 1.732016 | 16.97928 | 15.52134 |
| BnaC03g10890D | 0.108457 | 0.605434 | 0.010534 | 0.584349 | 3.094805 | 2.649393 | 0        | 0        | 0.061007 | 0.093199 | 2.580671 | 4.197495 |
| BnaA10g13800D | 7.191454 | 10.12443 | 4.257001 | 9.483133 | 29.20542 | 27.08059 | 0.303878 | 0.22119  | 1.0235   | 0.924607 | 9.994659 | 9.749105 |
| BnaC09g36350D | 6.354079 | 11.84805 | 3.47475  | 9.588258 | 17.1129  | 18.50291 | 3.906548 | 5.284188 | 5.548681 | 5.912688 | 33.18358 | 22.96896 |
| BnaA02g05810D | 0.017889 | 0.070231 | 0        | 0.085415 | 0.068321 | 0.015811 | 0        | 0        | 0        | 0.014942 | 0.111754 | 0.013485 |
| BnaA02g05790D | 0        | 0        | 0        | 0        | 0        | 0.088032 | 0.013094 | 0        | 0.014063 | 0.014602 | 0        | 0.014053 |
| BnaCnng34610D | 1.395851 | 0.595493 | 0.69993  | 3.799195 | 1.438766 | 4.145075 | 3.987993 | 2.225652 | 3.036752 | 5.419788 | 0.181318 | 0.47019  |
| BnaA02g05820D | 2.180877 | 2.086215 | 1.451145 | 2.996337 | 4.591788 | 3.165979 | 2.597661 | 3.321969 | 1.273094 | 3.344828 | 4.989705 | 3.617936 |
| BnaA04g16080D | 0.833191 | 1.262734 | 0.345504 | 1.249651 | 4.272226 | 4.023432 | 0.083747 | 0.439651 | 0.380718 | 0.666794 | 4.268026 | 6.821455 |
| BnaC04g39350D | 8.829801 | 13.73429 | 5.246243 | 7.507761 | 24.63128 | 22.77567 | 1.716244 | 4.482435 | 2.286339 | 3.387485 | 57.89643 | 39.61481 |
| BnaC01g23930D | 3.602764 | 7.35241  | 3.534618 | 7.857723 | 14.42529 | 12.33155 | 1.313597 | 2.866638 | 2.292368 | 2.624625 | 44.51624 | 43.20122 |
| BnaCnng02600D | 0        | 0        | 0        | 0        | 0        | 0        | 0        | 0        | 0        | 0        | 0        | 0        |

**Table S4.** RNA-seq data of expression levels of *BnaHDT* genes infected with *S. sclerotiorum*.

| gene_id       | Westar Control | Westar 24hpi | ZY821 Control | ZY821 24hpi |
|---------------|----------------|--------------|---------------|-------------|
| BnaA02g05840D | 0.356186333    | 0.1335198    | 1.88366       | 0.175538667 |
| BnaC02g09720D | 5.86514        | 23.81336667  | 1.685676      | 4.020363333 |
| BnaA03g08590D | 1.912766       | 8.579573333  | 2.2625        | 42.1359     |
| BnaC03g10890D | 0.280070367    | 5.966473333  | 1.35687       | 32.27626667 |
| BnaA10g13800D | 5.559086667    | 17.3852      | 7.6069        | 45.82286667 |
| BnaC09g36350D | 6.08331        | 14.34291     | 4.874573333   | 31.01666667 |
| BnaA02g05810D | 0.806768       | 1.386803333  | 0.327372667   | 0           |
| BnaA02g05790D | 0              | 0.034526333  | 0             | 0           |
| BnaCnng34610D | 0.459594333    | 0.377515     | 0             | 0           |
| BnaA02g05820D | 4.041793333    | 5.455313333  | 0.5788571     | 0.132761667 |
| BnaA04g16080D | 0.386425667    | 3.363276667  | 0.516782333   | 15.30636667 |
| BnaC04g39350D | #N/A           | #N/A         | #N/A          | #N/A        |
| BnaC01g23930D | 1.105142333    | 4.825896667  | 1.69495       | 10.17909    |
| BnaCnng02600D | 8.529536667    | 13.13366667  | 8.825866667   | 28.03213333 |
